# Supplementary material for: Menthyl esterification allows chiral resolution for the synthesis of artificial glutamate analogs
Source: publisher site journal article supplement (doi:10.3762/bjoc.17.48), 2021-02-24

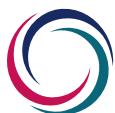

## Supporting Information

for

### **Menthyl esterification allows chiral resolution for the synthesis of artificial glutamate analogs**

Kenji Morokuma, Shuntaro Tsukamoto, Kyosuke Mori, Kei Miyako, Ryuichi Sakai, Raku Irie and Masato Oikawa

*Beilstein J. Org. Chem.* **2021**, *17*, 540–550. doi:10.3762/bjoc.17.48

### **Stereo diagrams for 10, 21\*, and 21 as well as superimposed structures of the stable conformers of 10\***

# Contents:

Stereo diagram of the most stable conformer in Figure 3, generated by CONFLEX (MMFF94S) for **10** SV-2

Stereo diagram of the most stable conformer in Figure 7, generated by CONFLEX (MMFF94S) for **21\*** SV-3

Stereo diagram of the most stable conformer in Figure 8, generated by CONFLEX (MMFF94S) for **21** SV-4

Superimposed structures of the top 7 stable conformers (97.5% total population) generated by CONFLEX (MMFF94S) for **10\*** (2S) show the single bonds between the heterotricycle and the menthyl ring are freely rotating SV-5

Stereo diagram of the most stable conformer  
generated by CONFLEX (MMFF94S) for **10**  
(parallel viewing)

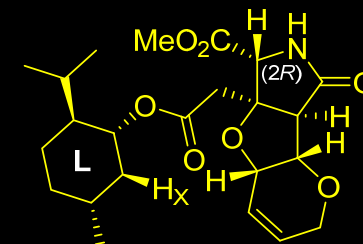

(2R)-isomer

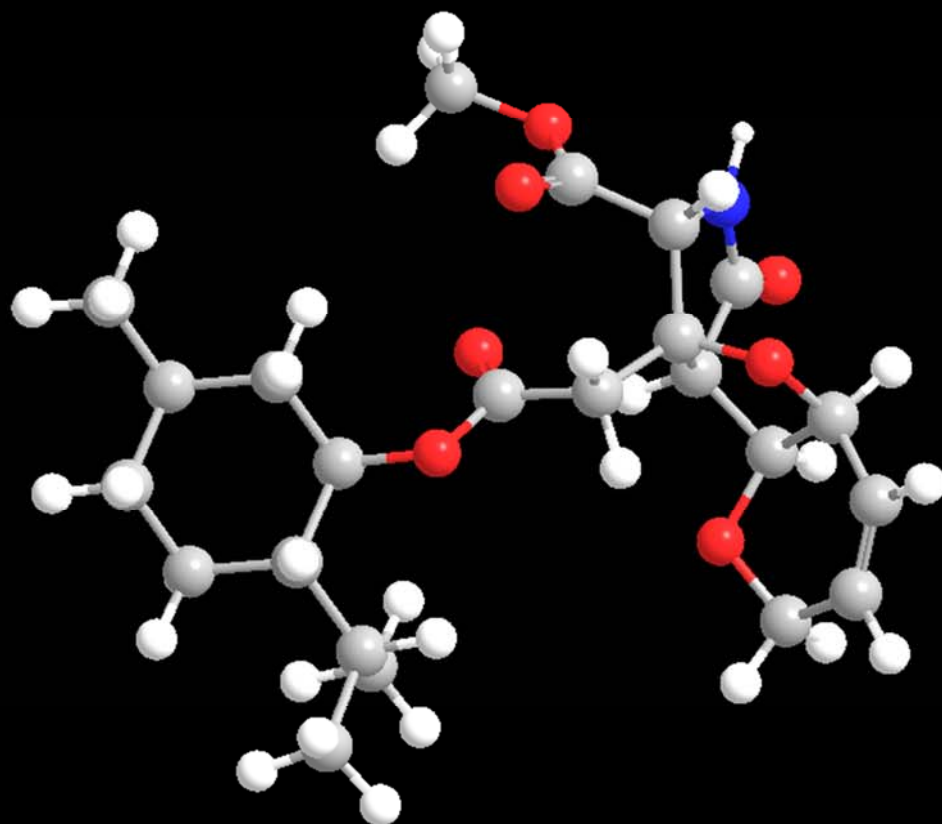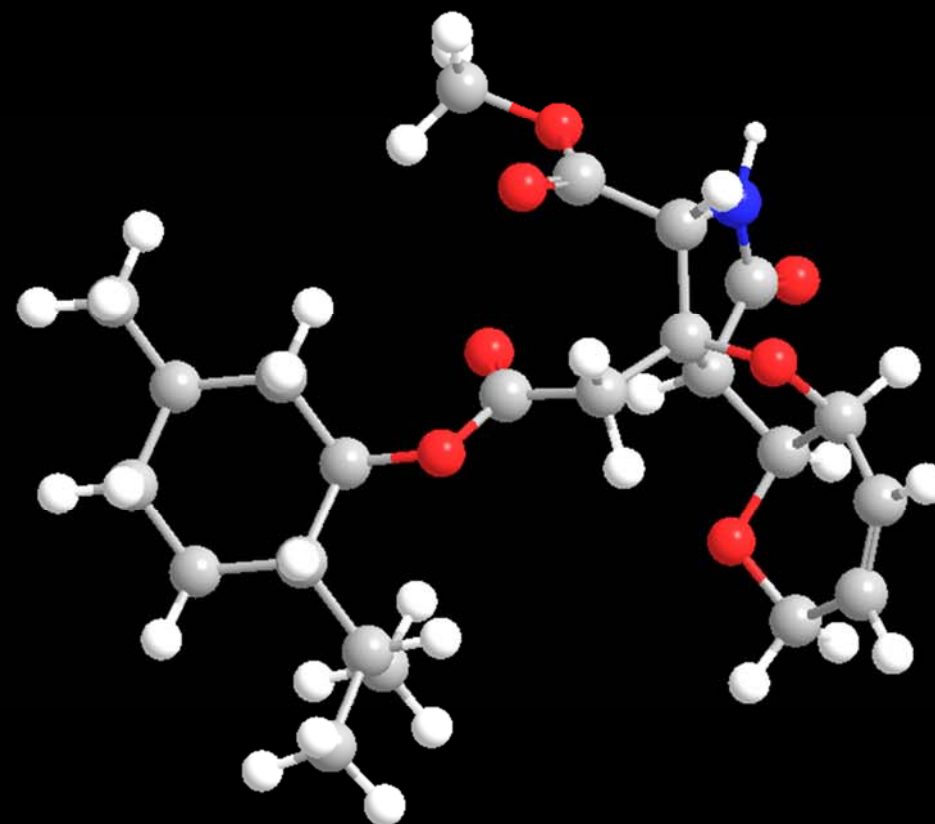

Stereo diagram of the most stable conformer  
generated by CONFLEX (MMFF94S) for **21\*** (2S)  
(parallel viewing)

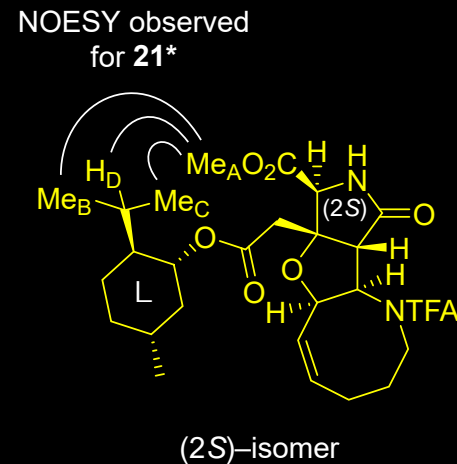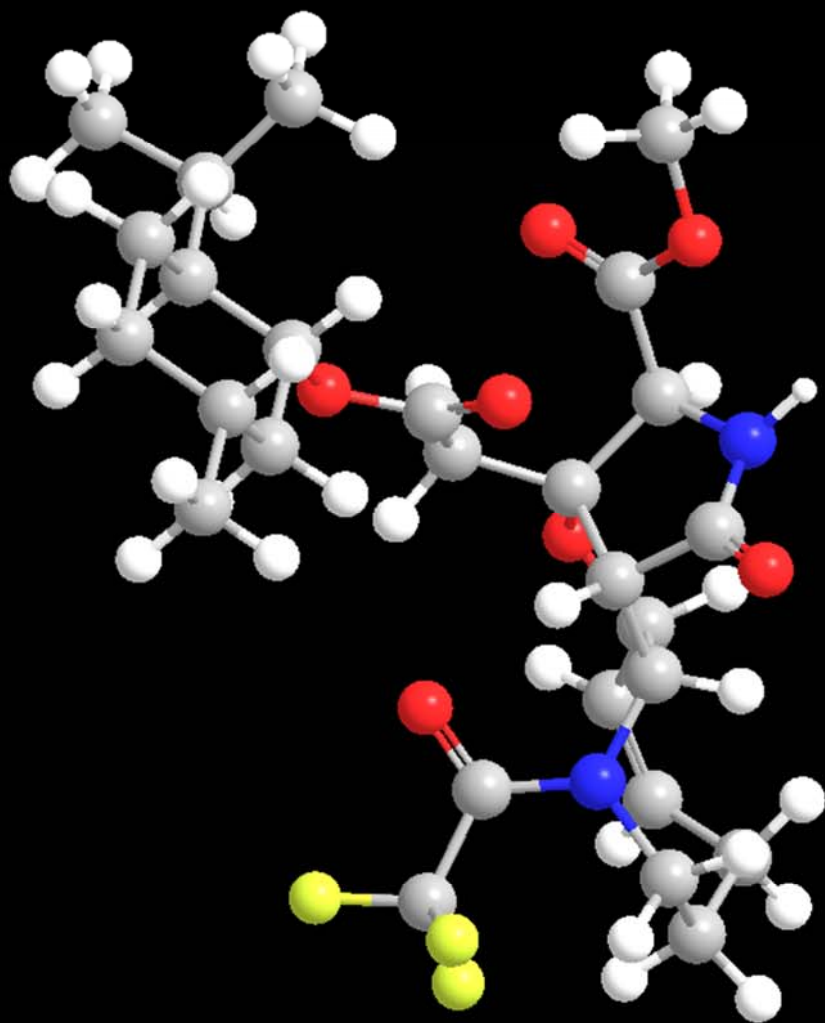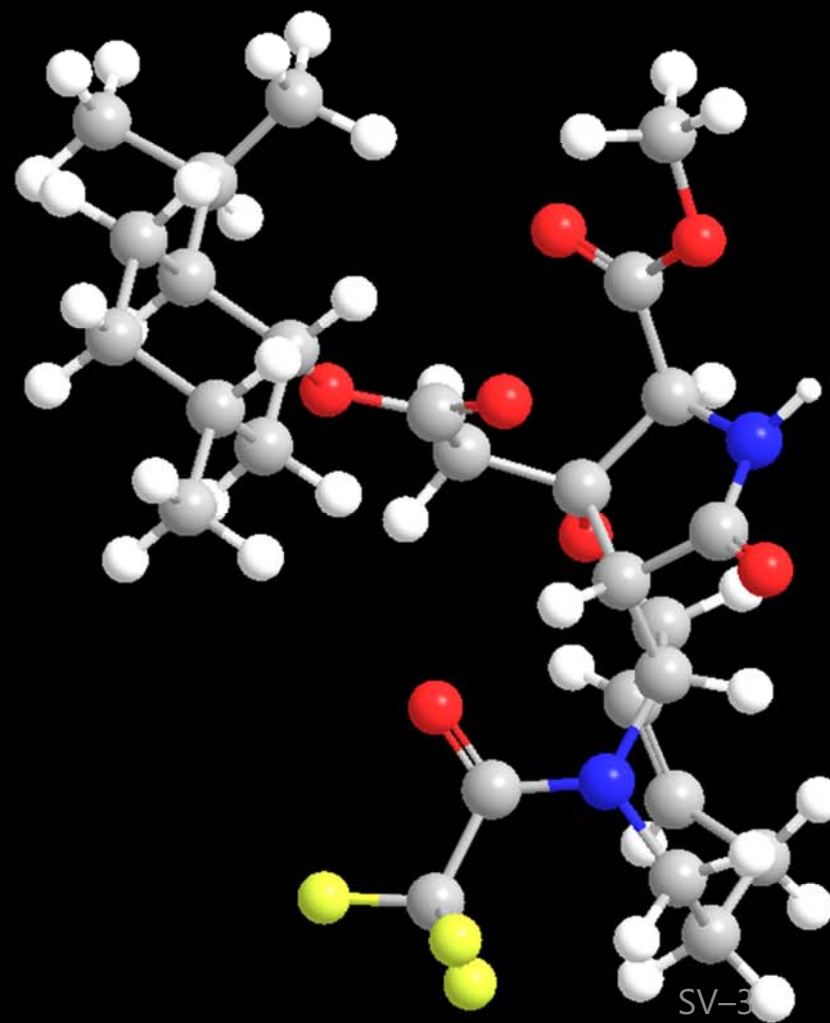

Stereo diagram of the most stable conformer  
generated by CONFLEX (MMFF94S) for **21** (2*R*)  
(parallel viewing)

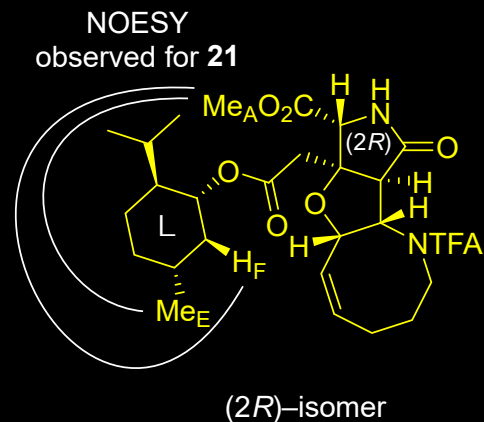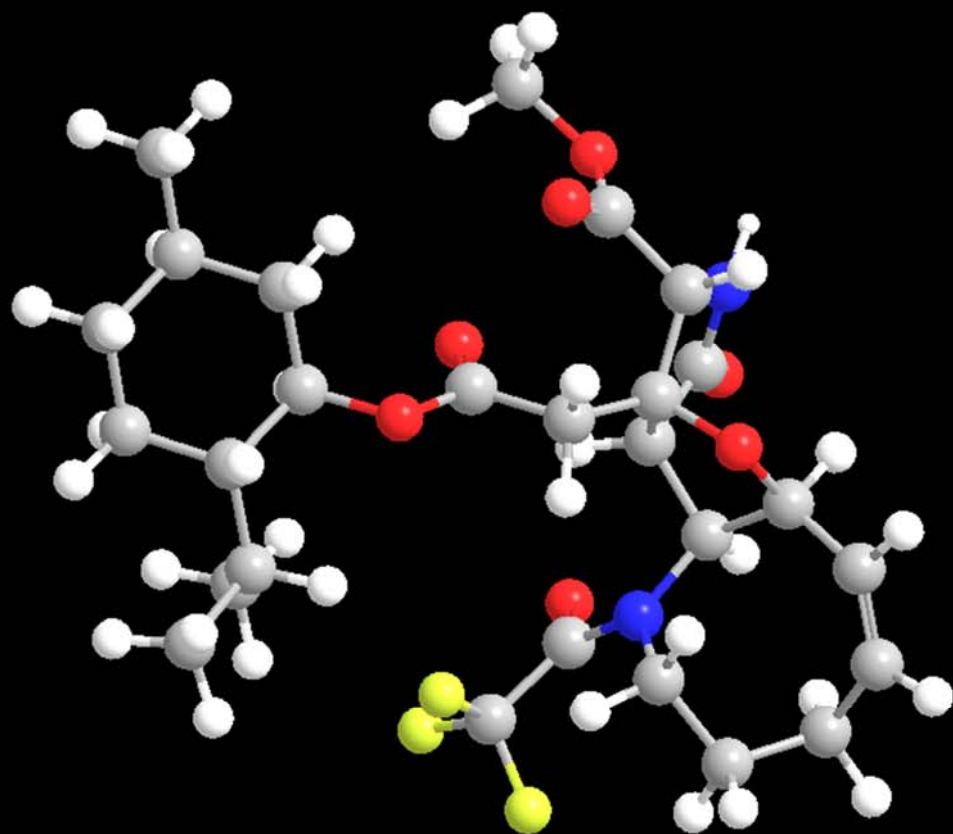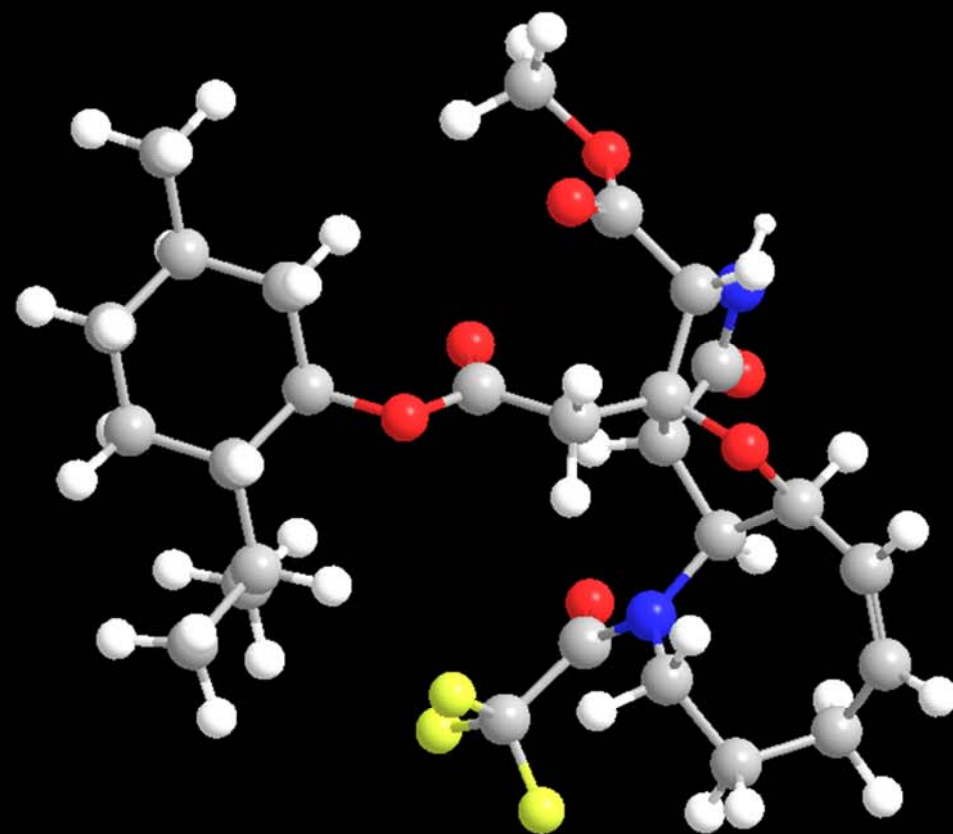

Superimposed structures of the top 7 stable conformers (97.5% total population) generated by CONFLEX (MMFF94S) for **10\*** (2S) show the single bonds between the heterotricycle and the menthyl ring are freely rotating

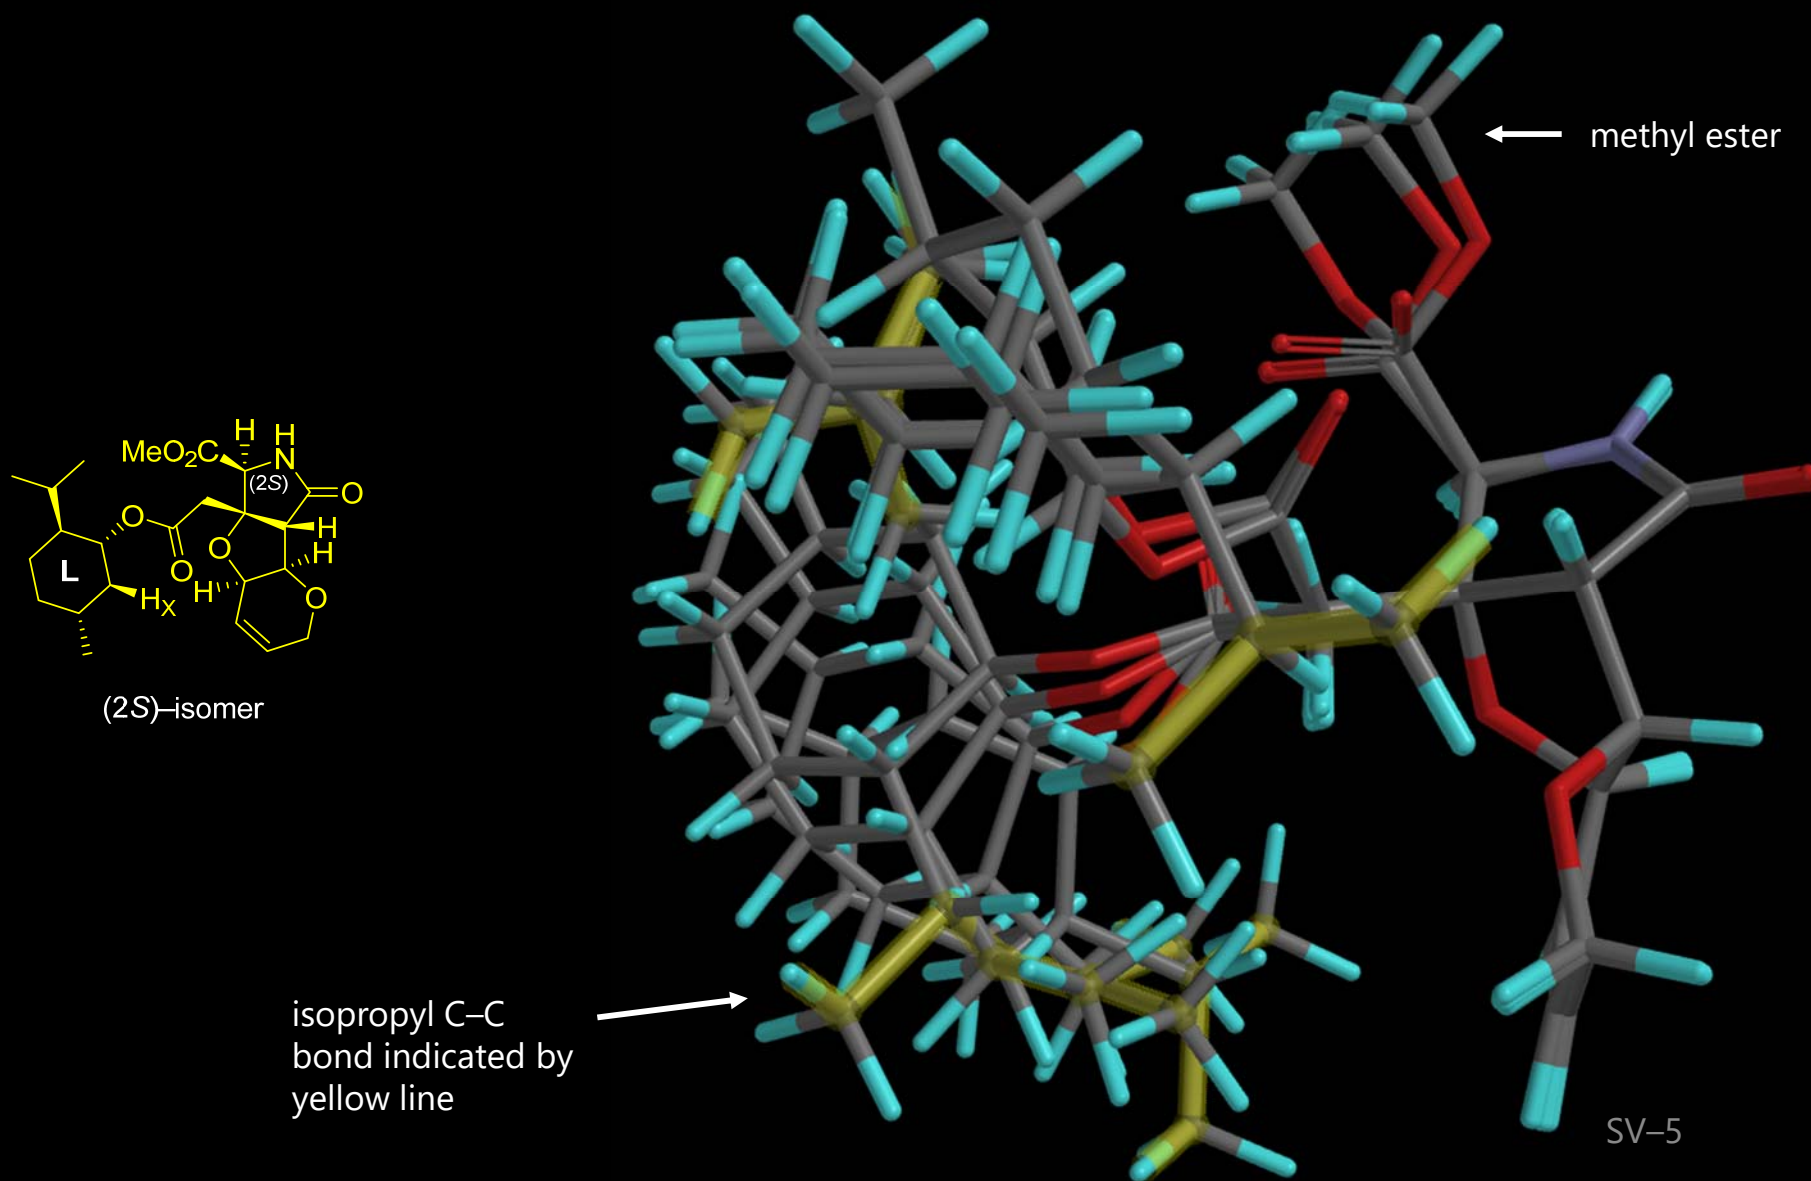

Supplement: Additional file 5 [file 1860-5397-17-48-S5.pdf]
