# Supplementary material for: Menthyl esterification allows chiral resolution for the synthesis of artificial glutamate analogs
Source: publisher site journal article supplement (doi:10.3762/bjoc.17.48), 2021-02-24
Supplement: Additional file 6 [file 1860-5397-17-48-S6.pdf]

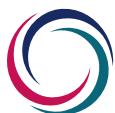

## Supporting Information

for

### **Menthyl esterification allows chiral resolution for the synthesis of artificial glutamate analogs**

Kenji Morokuma, Shuntaro Tsukamoto, Kyosuke Mori, Kei Miyako, Ryuichi Sakai, Raku Irie and Masato Oikawa

*Beilstein J. Org. Chem.* **2021**, *17*, 540–550. doi:10.3762/bjoc.17.48

### **Assignments and intensities of all NOESY crosspeaks observed for 10\*, 10, 21\*, and 21**

# Contents:

Assignments and intensities of all NOESY cross  
peaks observed for **10\*** (2*S*) SVI-2

Assignments and intensities of all NOESY cross  
peaks observed for **10** (2*R*) SVI-6

Assignments and intensities of all NOESY cross  
peaks observed for **21\*** (2*S*) SV-11

Assignments and intensities of all NOESY cross  
peaks observed for **21** (2*R*) SV-13

Assignments and  
intensities of all NOESY  
cross peaks observed for  
**10\*** (2S)

# $^1\text{H}$ NMR for **10\*** (2*S*) (400 MHz, $\text{CDCl}_3$ )

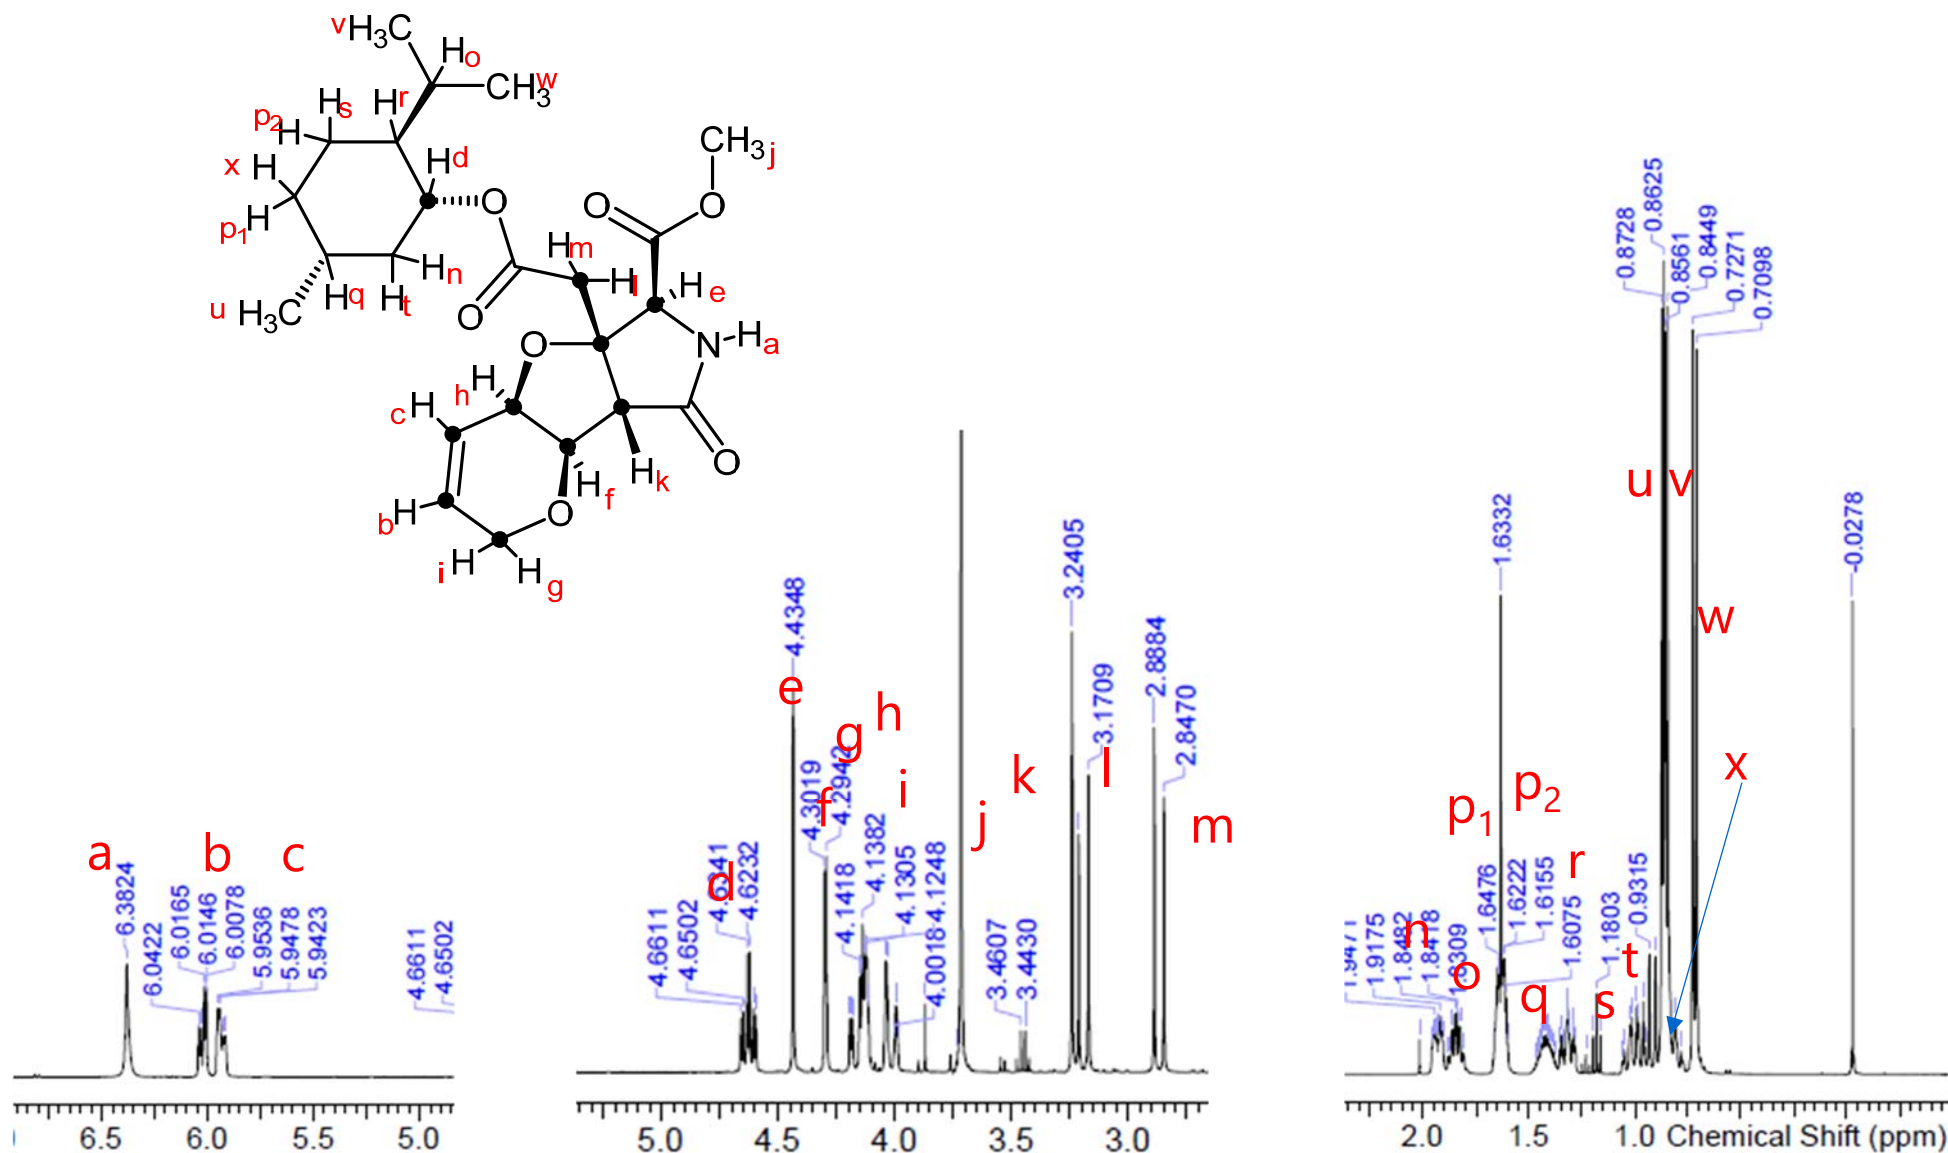

# NOESY analysis of **10\*** (2*S*) (400 MHz, CDCl<sub>3</sub>) #1/2

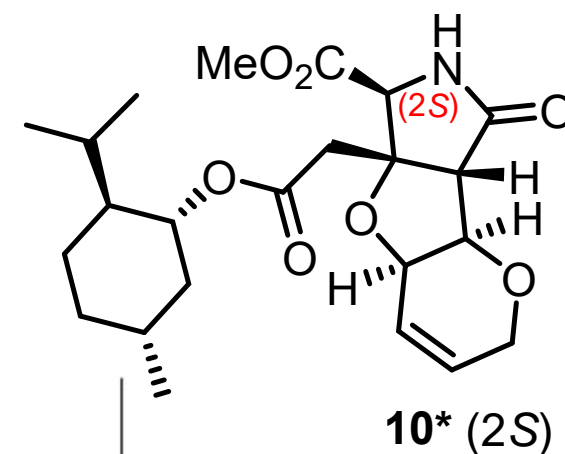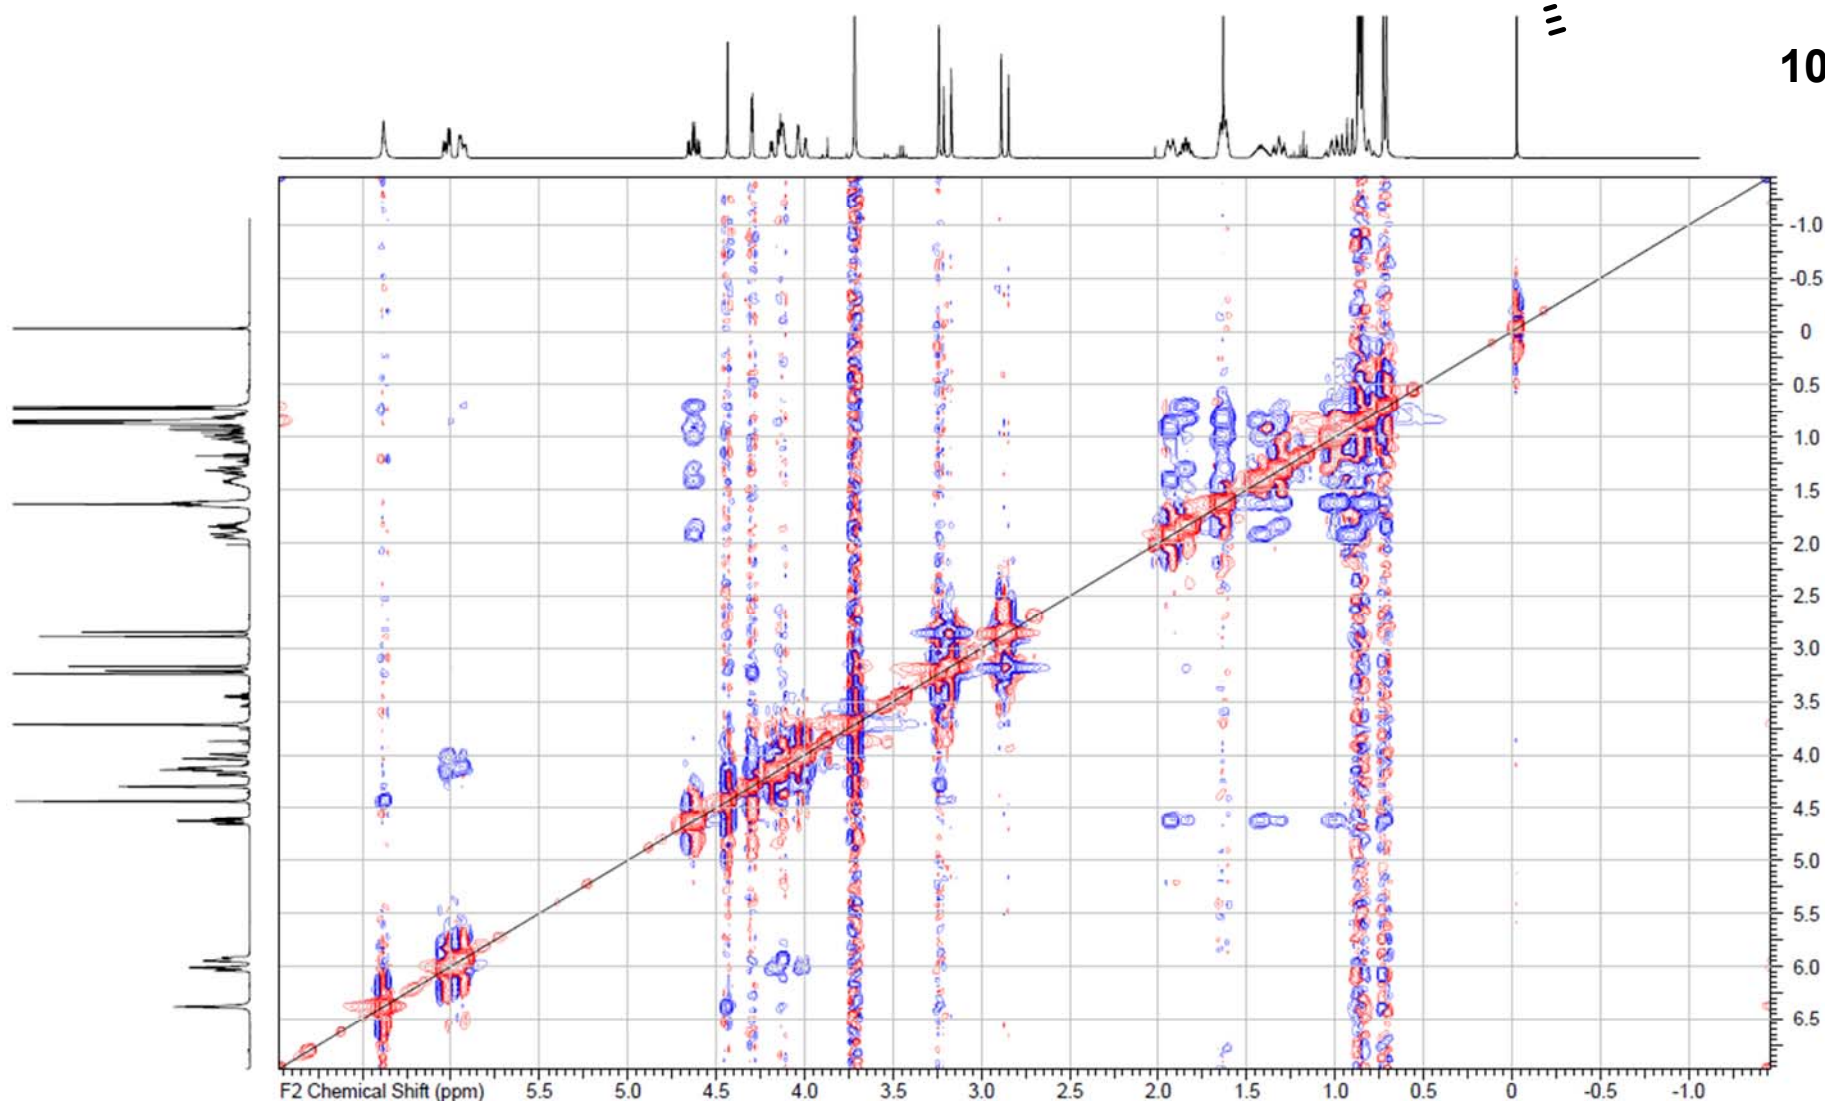

Date 21 Mar 2019 05:53:34

Kenji Morokuma  
AA70071-001

Nucleus (1H, 1H)  
Pulse Sequence noesygpphph\_Bruker\_AVIII400N  
Solvent CHLOROFORM-d

Frequency (MHz) (400.1800, 400.1800)  
Spectrum Type NOESY  
Sweep Width (Hz) (3375.08, 3375.08)

Number of Transients 8  
Original Points Count (1024, 1024)  
Points Count (1024, 1024)

65/154

# NOESY analysis of **10\*** (2S) (400 MHz, CDCl<sub>3</sub>) #2/2

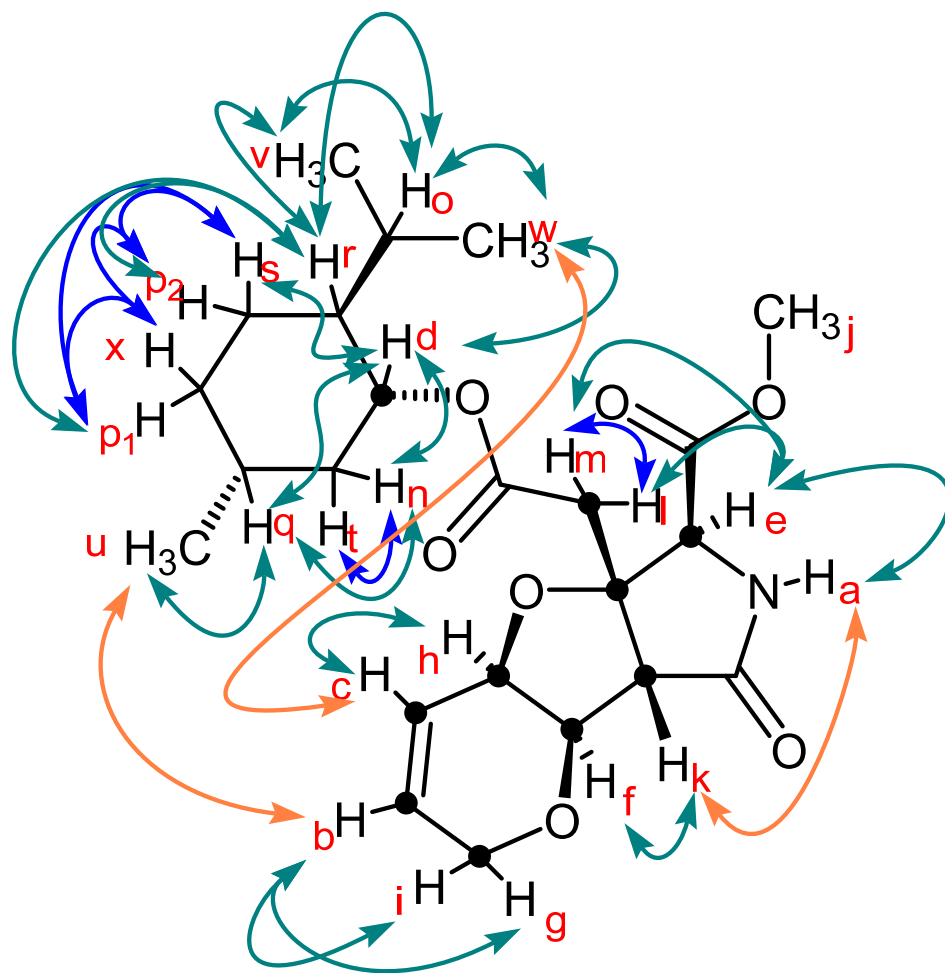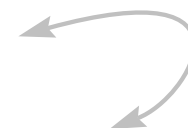

NOE  
strong/medium/weak

Assignments and  
intensities of all NOESY  
cross peaks observed for  
**10** (*2R*)

# $^1\text{H}$ NMR for **10** (2*R*) (400 MHz, $\text{CDCl}_3$ )

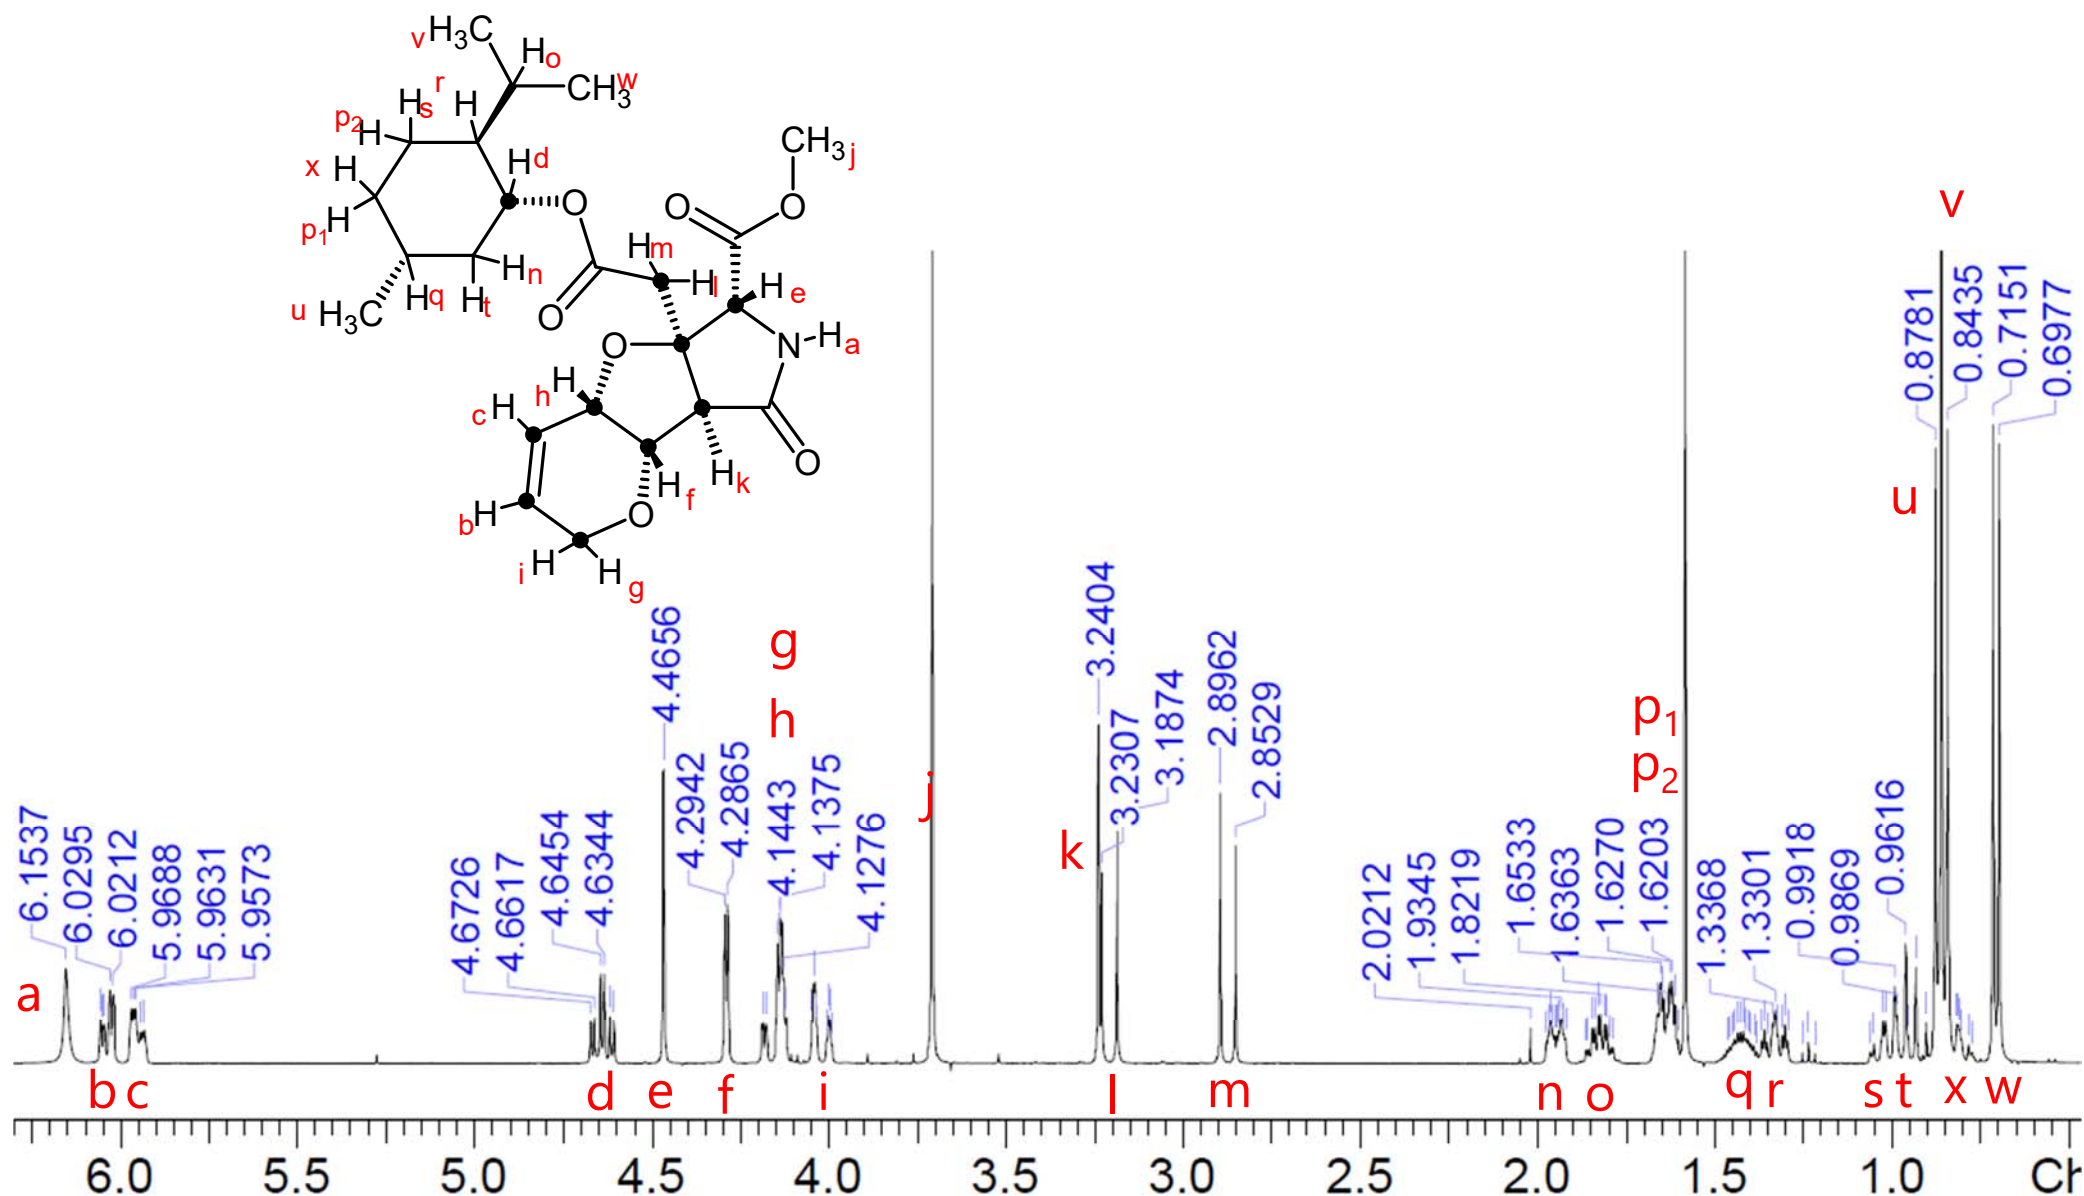



# NOESY analysis of **10** (2*R*) (400 MHz, CDCl<sub>3</sub>) #1/3

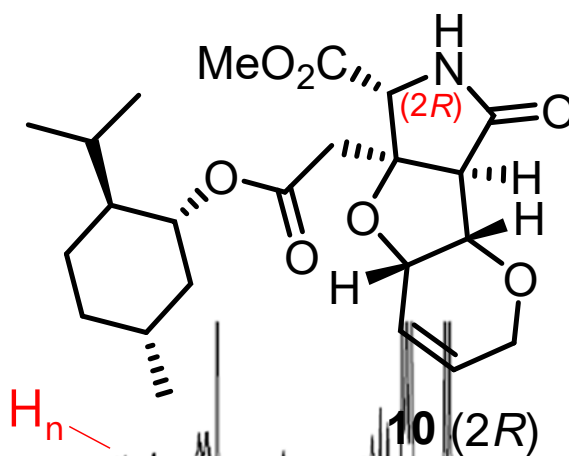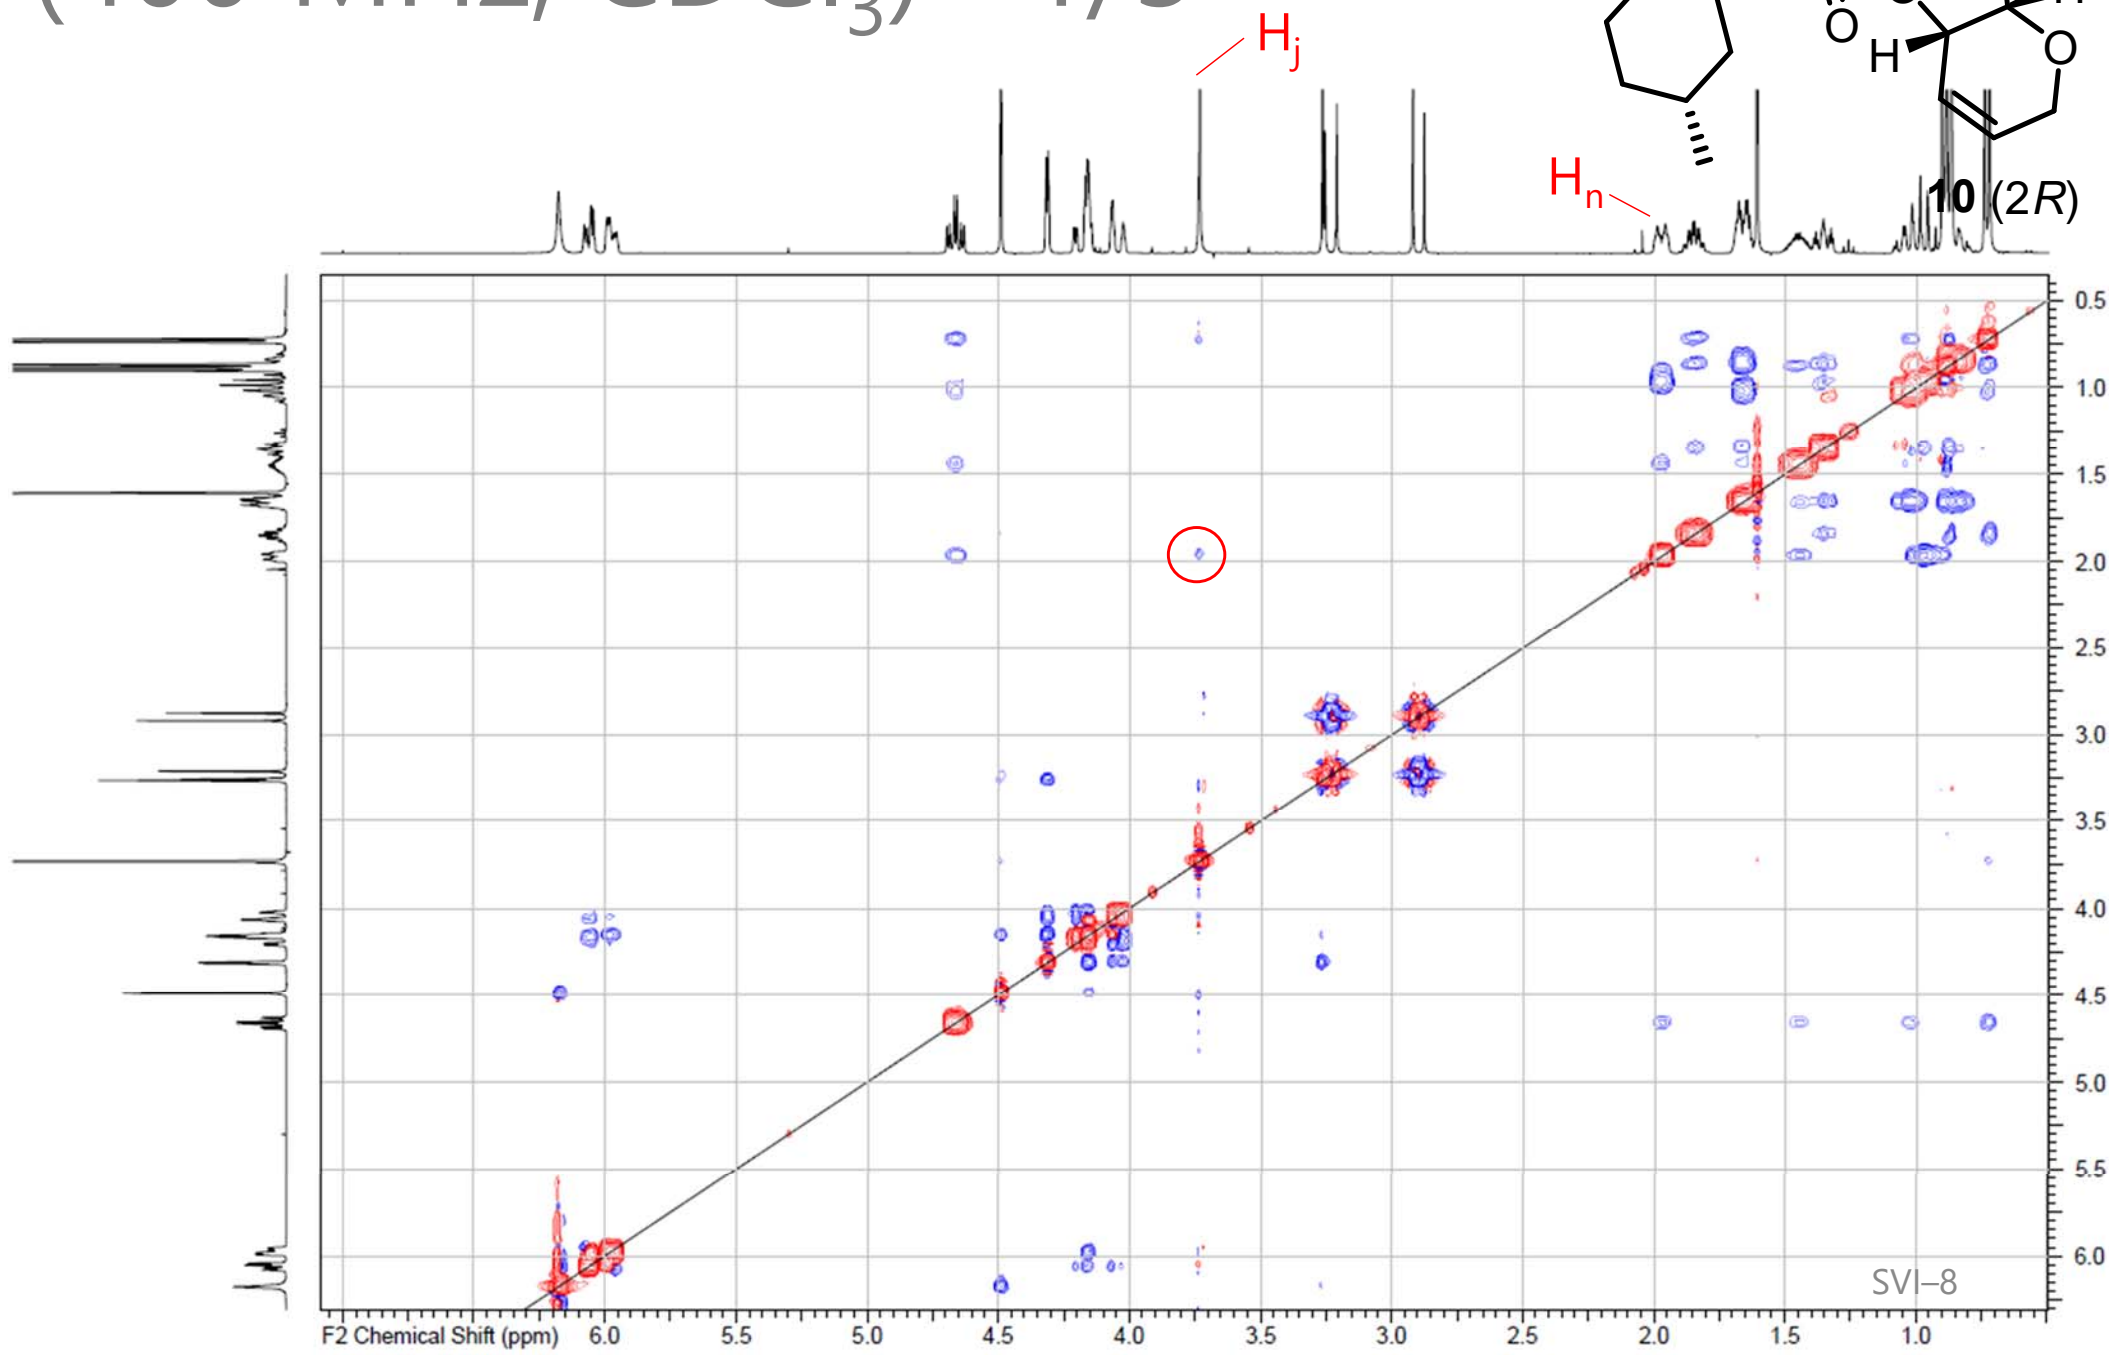

# NOESY analysis of **10** (2*R*) (400 MHz, CDCl<sub>3</sub>) #2/3

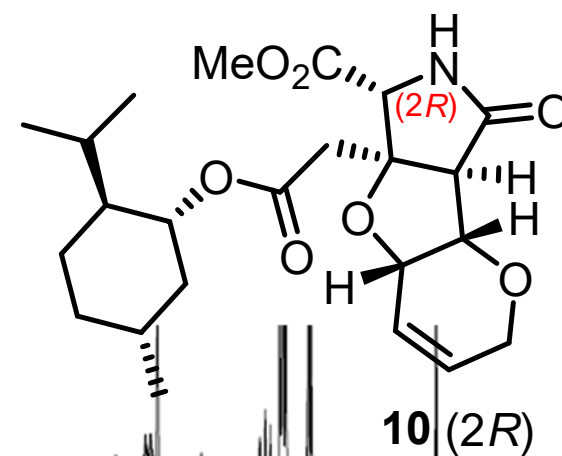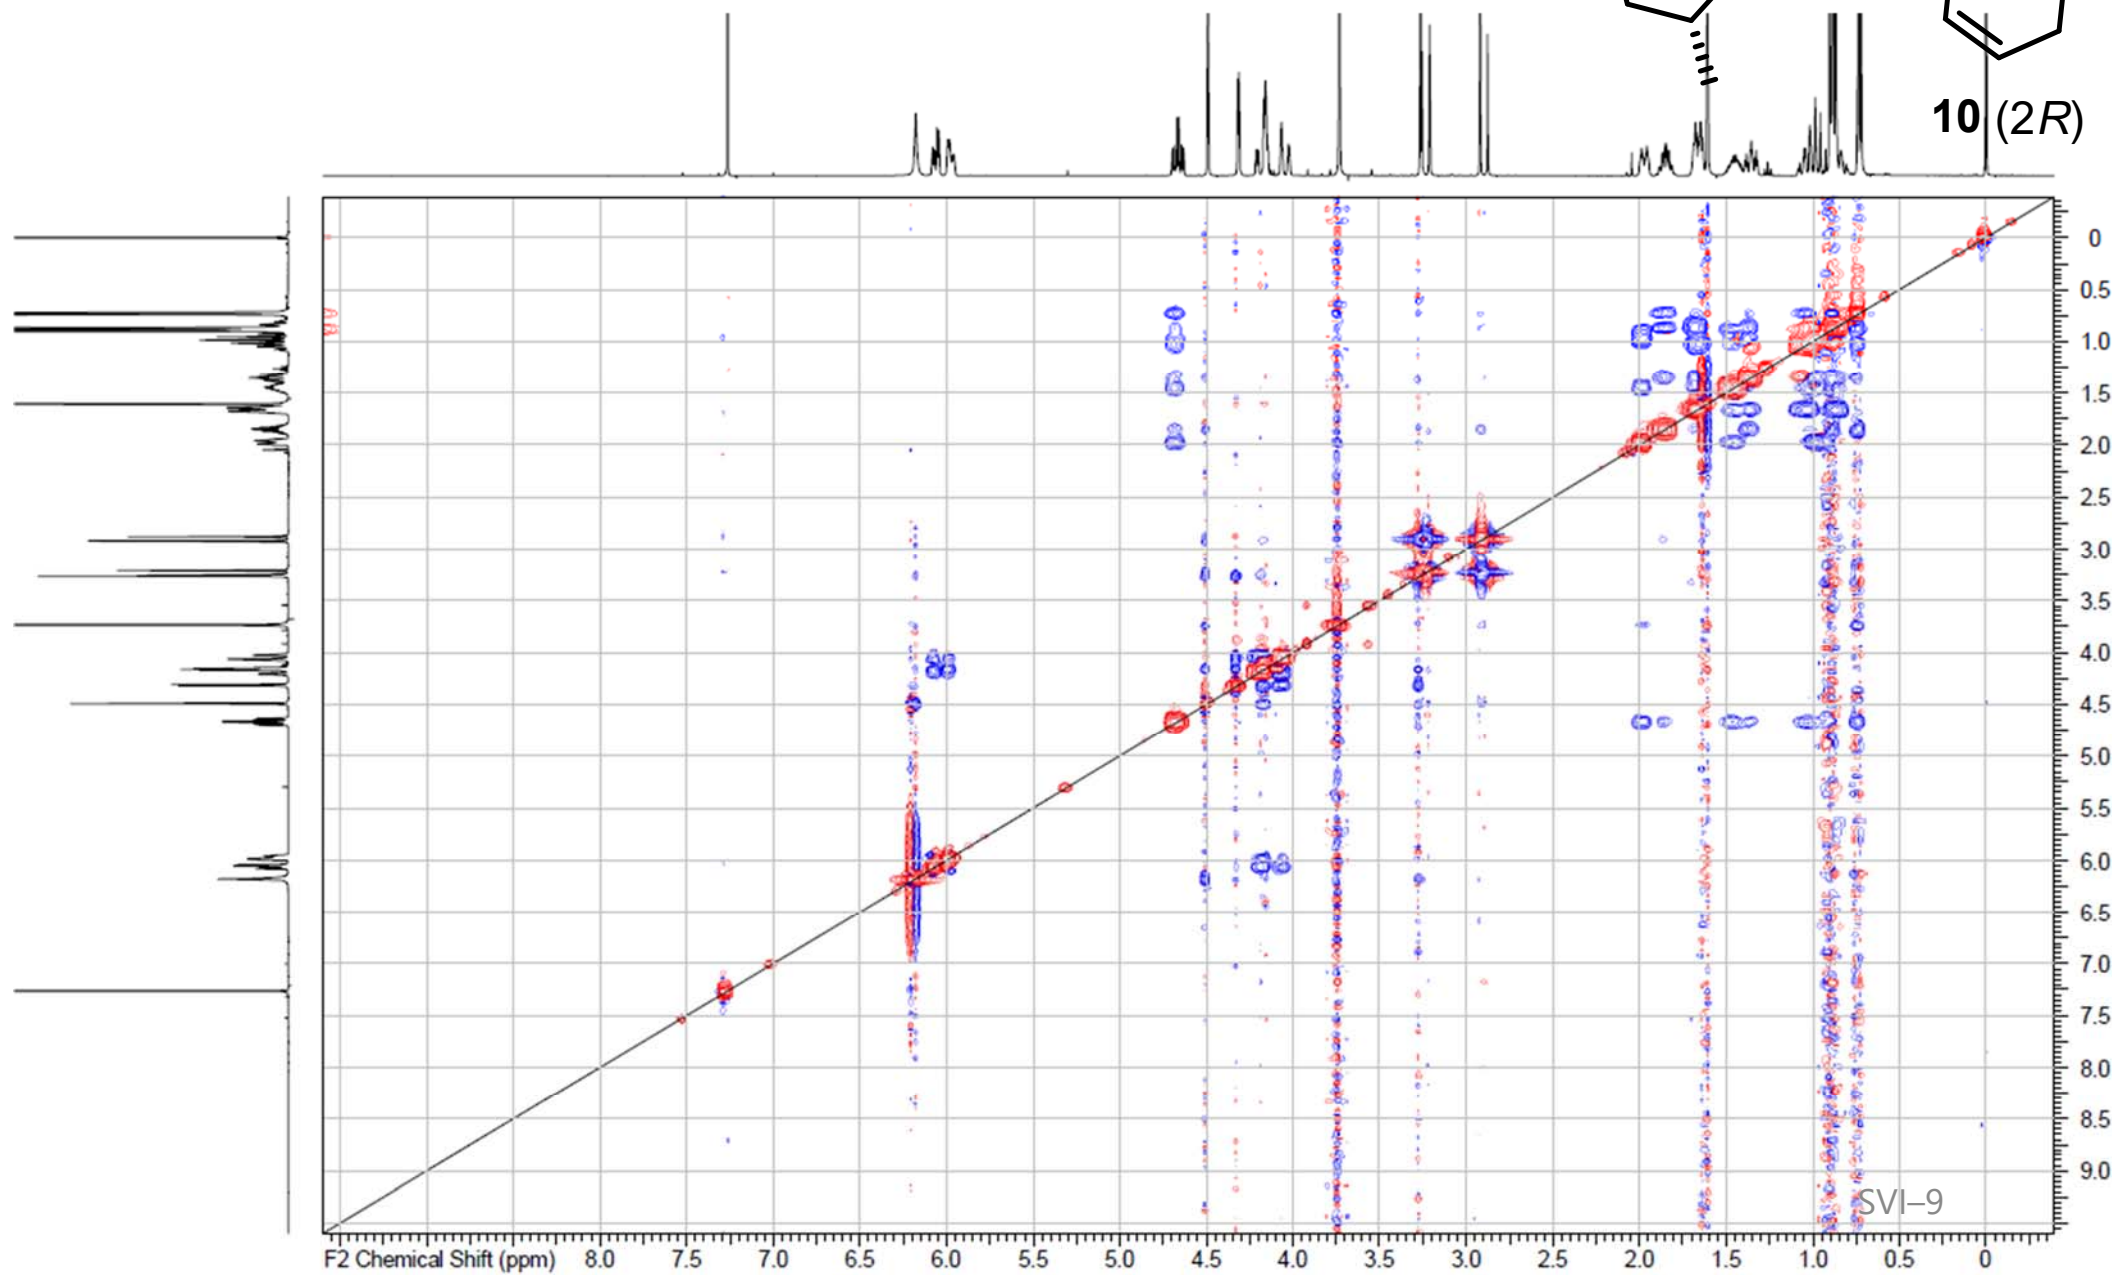

NOESY analysis of **10** (2*R*)  
(400 MHz, CDCl<sub>3</sub>) #3/3

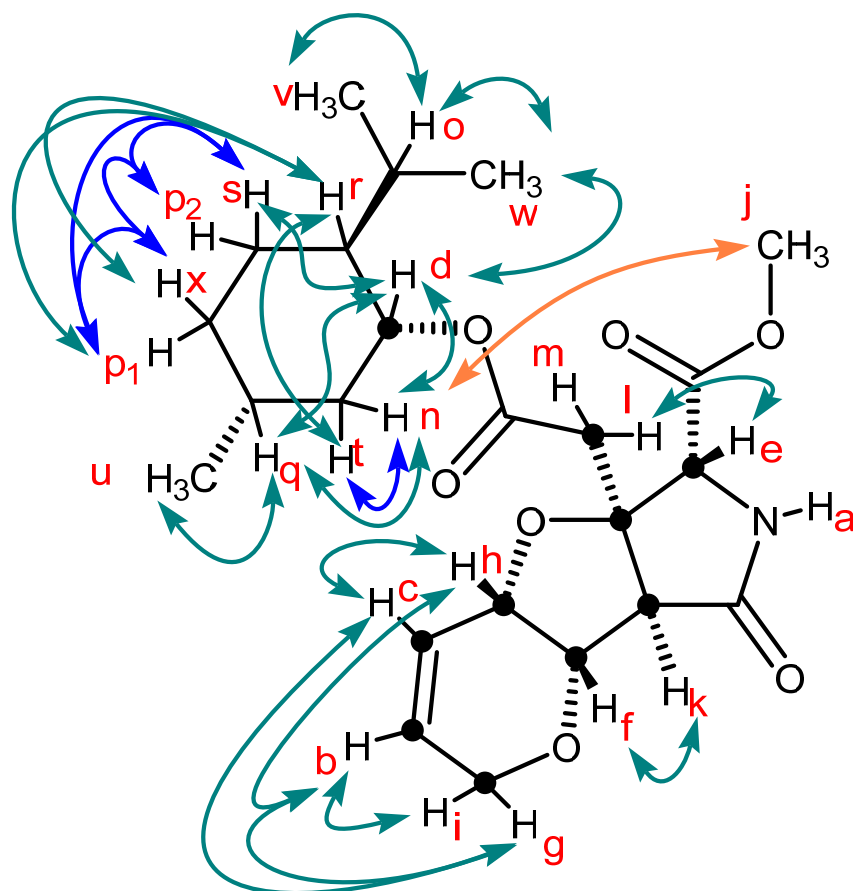

NOE  
strong/medium/weak

Assignments and  
intensities of all NOESY  
cross peaks observed for  
**21\*** (2S)

# NOESY analysis of **21\*** (2S) (400 MHz, CDCl<sub>3</sub>)

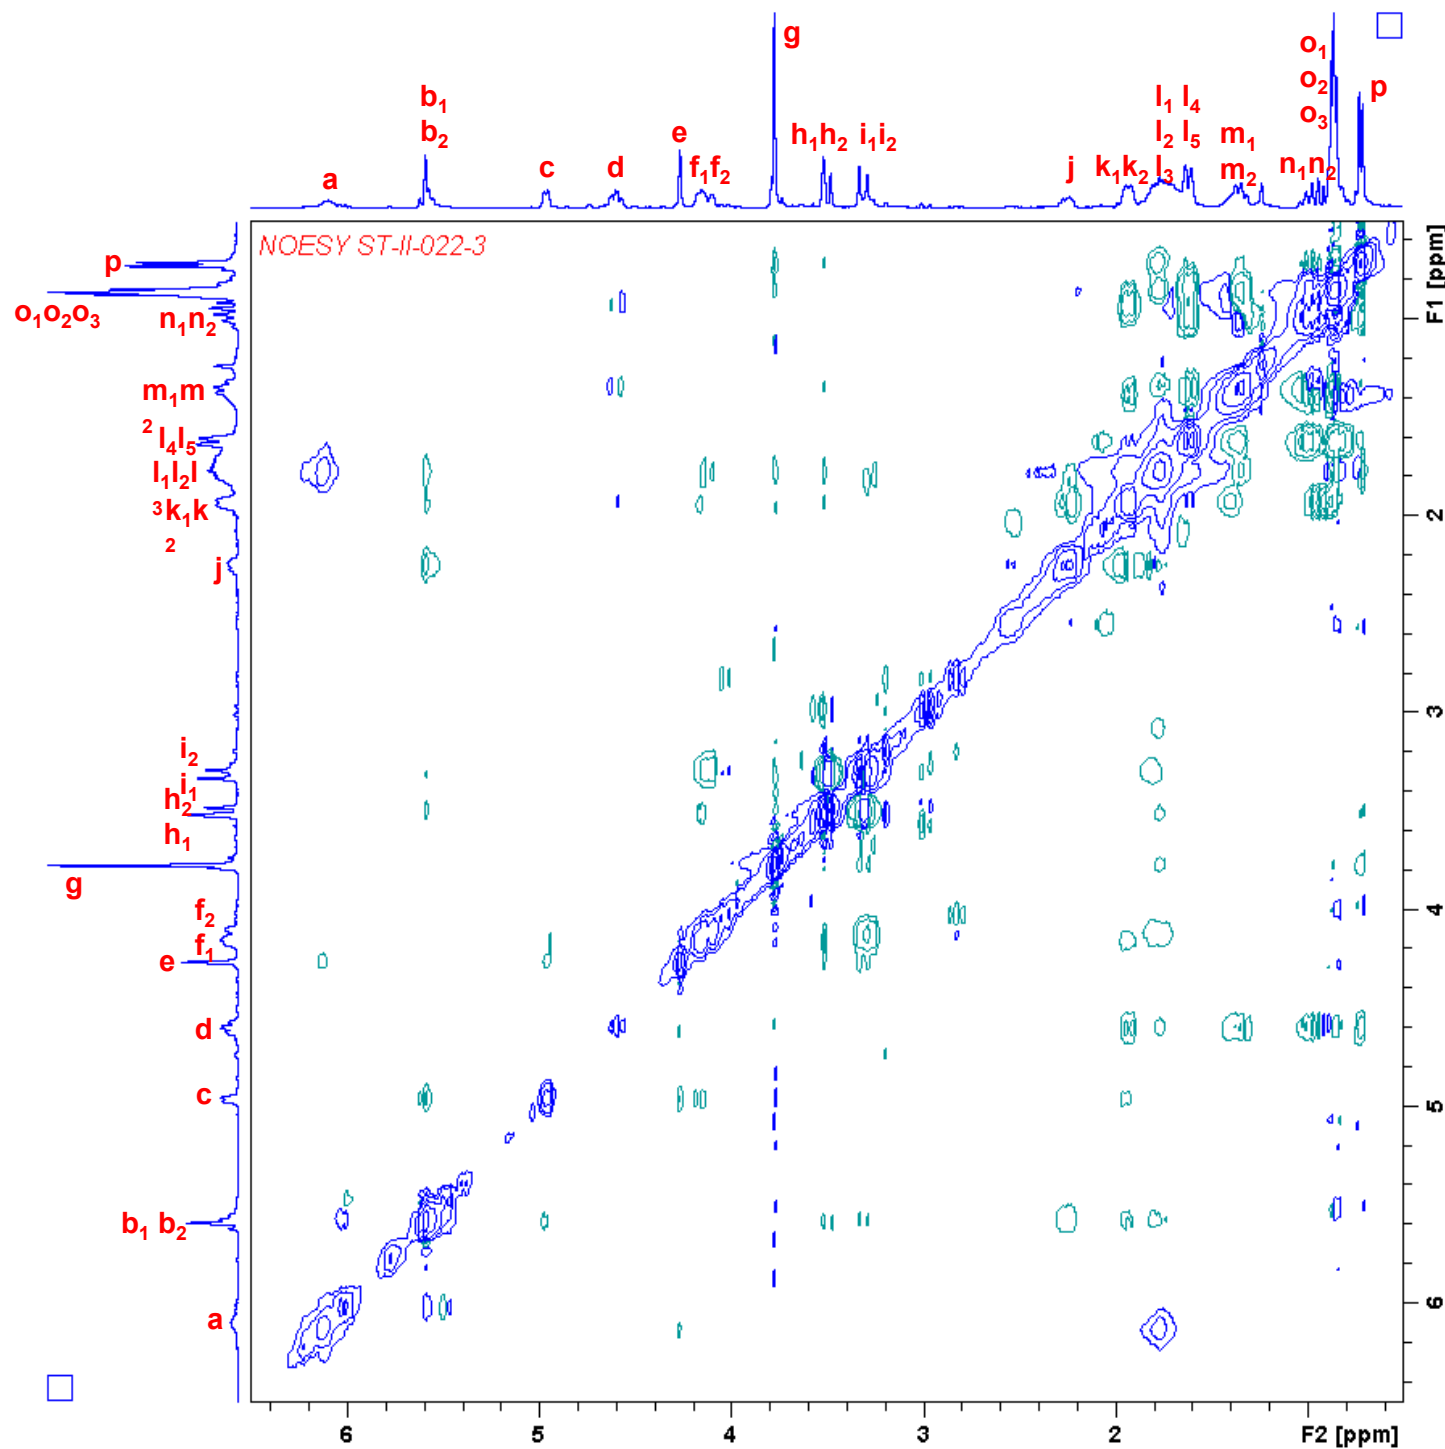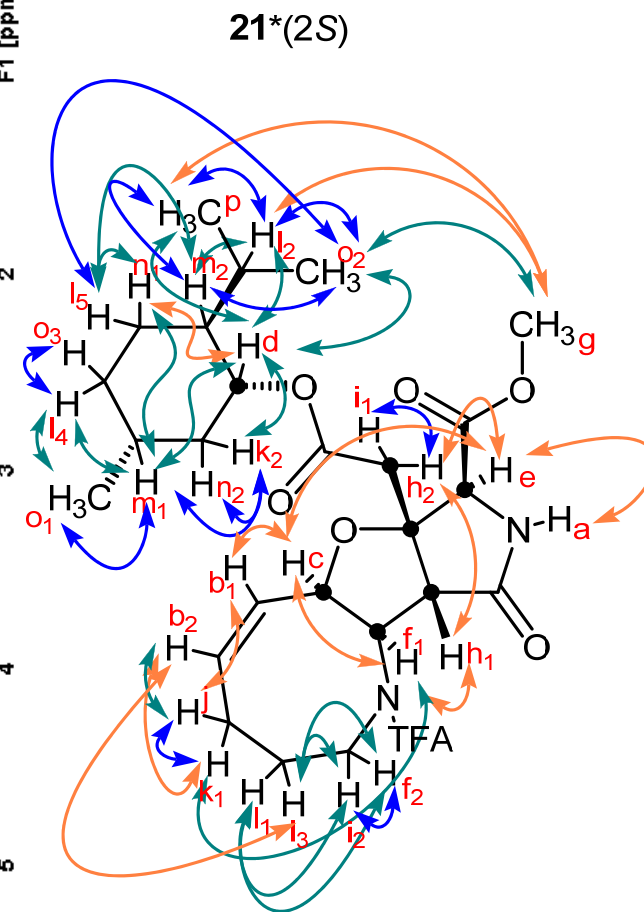

NOE  
 strong/medium/weak  
 SVI-12

Assignments and  
intensities of all NOESY  
cross peaks observed for  
**21** (*2R*)

# NOESY analysis of **21** (2*R*) (400 MHz, CDCl<sub>3</sub>)

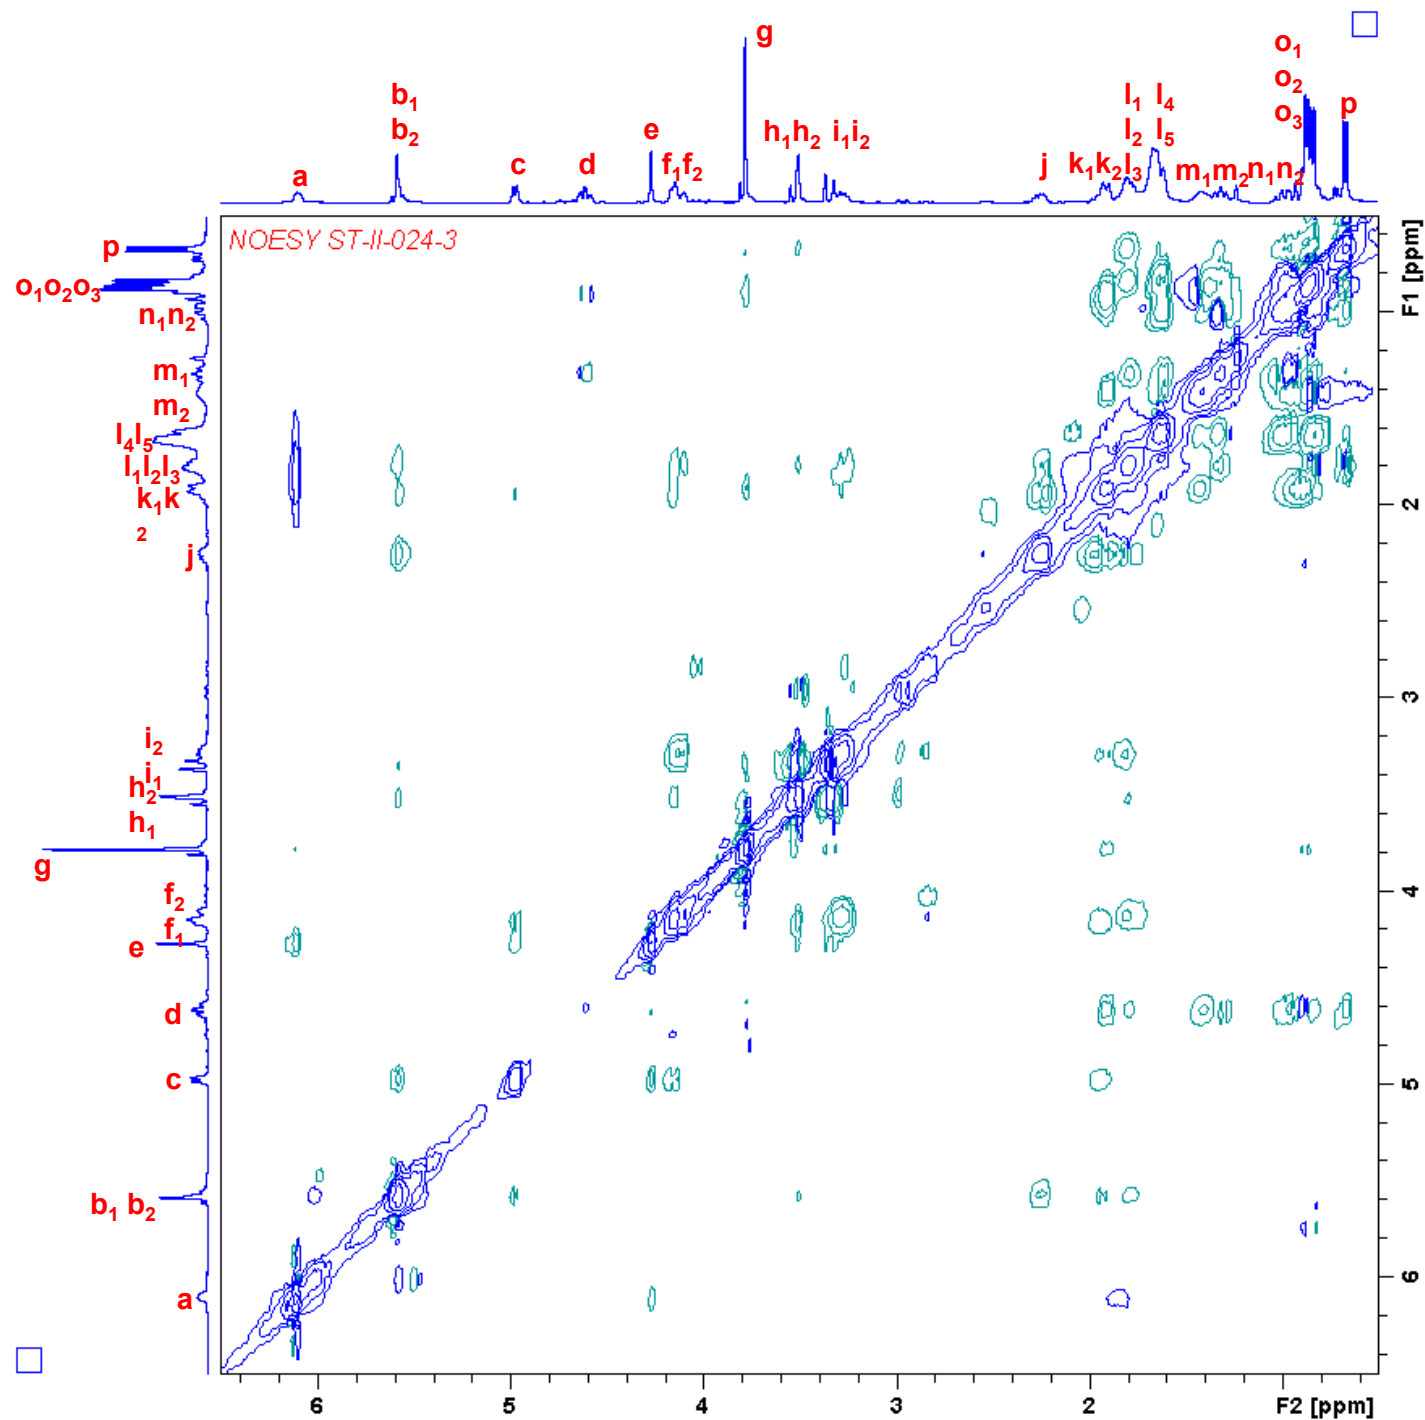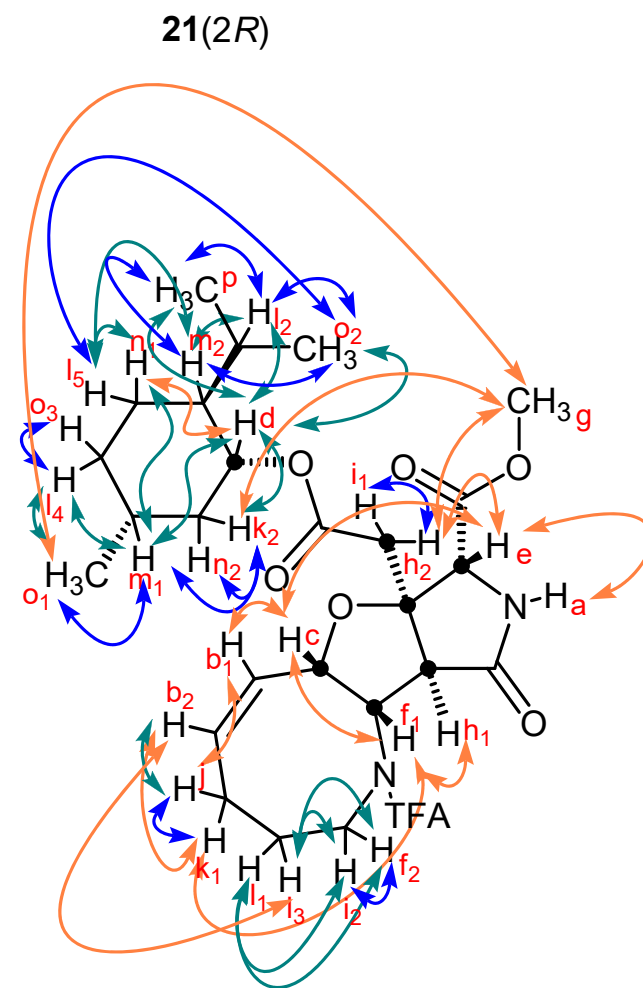

NOE  
strong/medium/weak
